# Supplementary material for: Dual-functional cyclic peptide switch on mesoporous nanocontainers for selective CD44 targeting and on–off gatekeeping triggered by conformational transformation
Source: Royal Society of Chemistry journal article supplement (doi:10.1039/c8nj02179a), 2018-01-01
Supplement: c8nj02179a1.pdf [file c8nj02179a1.pdf]

**Electronic Supplementary Information**

**Dual-Functional Cyclic Peptide Switch on  
Mesoporous Nanocontainers for Selective CD44  
Targeting and On-Off Gatekeeping Triggered  
by Conformational Transformation**

*Jeonghun Lee,<sup>a</sup> Eun-Taex Oh,<sup>b</sup> Min Hyeuk Choi,<sup>a</sup> Ha Gyeong Kim,<sup>c</sup> Heon Joo Park,<sup>\*,c</sup>  
and Chulhee Kim<sup>\*,a</sup>*

<sup>a</sup>Department of Polymer Science and Engineering, Inha University, Incheon 22212, Korea

<sup>b</sup>Department of Biomedical Sciences, School of Medicine, Inha University, Incheon 22212,  
Korea

<sup>c</sup>Department of Microbiology, Hypoxia-related Disease Research Center, College of  
Medicine, Inha University, Incheon 22212, Korea

**\*Corresponding Author:** [chk@inha.ac.kr](mailto:chk@inha.ac.kr), [park001@inha.ac.kr](mailto:park001@inha.ac.kr)

## ***Experimental Section***

**Materials.** Hexadecyltrimethylammonium bromide (CTAB), tetraethylorthosilicate (TEOS), 3-aminopropyltriethoxysilane, propargyl bromide, copper (II) sulfate, trifluoroacetic acid (TFA), ninhydrin, piperidine, doxorubicin (DOX), glutathione (GSH), acetic anhydride, triethylamine, poly(ethylene glycol) methyl ether and sodium L-ascorbate were obtained from Sigma Aldrich and used as received. N,N'-dimethylformamide (DMF), triisopropylsilane were purchased from Acros organics. 3,6-Dioxa-1,8-octane-dithiol, N,N-diisopropylcarbodiimide (DIC) were purchased from TCI. 1-Hydroxybenzotriazole (HOBT) and Rink Amide MBHA resin were purchased from Advanced Chem. Tech. Fmoc-L-Dap(N<sub>3</sub>)-OH was purchased from IRIS Biotech GmbH. Fmoc-protected amino acids from Novabiochem were used as received. All solvents were purified using a published procedure.<sup>1</sup>

**Transmission electron microscopy.** TEM images were obtained using a Philips CM 200 instrument operated at an acceleration voltage of 120 kV. TEM samples were prepared by placing a drop of dispersed sample in distilled water (100 mg·L<sup>-1</sup>) onto a 300-mesh copper grid coated with carbon film and was dried in vacuum oven for over 3 hours.

### **Synthesis of DOX-loaded silica nanoparticles without peptide gatekeepers.**

Surfactant was removed from silica nanoparticles four times by stirring Si-alkyne (500 mg) in 50 mL of ethanol with 2g of ammonium nitrate at 80 °C for 30 min. The resulting solid was washed thoroughly with ethanol. For DOX loading, surfactant-removed Si-alkyne (20 mg) was soaked in a DMF solution (0.2 mL) of DOX (1 mg) and stirred overnight. The resulting solid was washed rapidly with DMF and distilled water.

**Fluorescence measurements.** All the fluorescence measurements were performed using a Shimadzu RF-5301PC spectrofluorophotometer with an excitation wavelength of 485 nm (absorption maximum wavelength of DOX). Emission and excitation slit widths were set at 15 nm and 3 nm, respectively.

**Fourier transform infrared spectroscopy.** FT-IR spectra were obtained using VERTEX 80V vacuum spectrometer.

**Zeta-potential analysis.** Zeta-potential values were obtained using an OTSUKA Particle Size Analyzer ELS-Z2 using the dispersed samples in distilled water.

**Powder X-ray diffraction.** Powder X-ray diffraction analysis was performed on a Rigaku DMAX 2200V counter diffractometer with a  $\text{Cu}_{K\alpha}$  radiation source (Operated at 60 kV, 60 mA).

**Pore diameter analysis.** Brunauer-Emmett-Teller (BET) nitrogen adsorption/desorption isotherms and Barrett-Joyner-Halenda (BJH) pore size distribution analysis were performed at 77 K on a Quantachrome instrument (ASAP 2020).

**Antibodies.** Antibodies against CD44, cleaved caspase-3, PARP, and  $\beta$ -actin were obtained from Cell Signaling Technology (Beverly, MA, USA).

**Statistical Analysis.** All grouped data are presented as the means  $\pm$  S.E.M. Differences between groups were analyzed by ANOVA or Student's t-test using GraphPad Prism

software (GraphPad Software, Inc, La Jolla, CA, USA). All experiments were repeated in at least duplicate with triplicate technical replicates.



Inha\_4 #30-43 RT: 1.25-1.75 AV: 5 NL: 1.88E6  
T: + p ESI Full ms [50.00-2000.00]

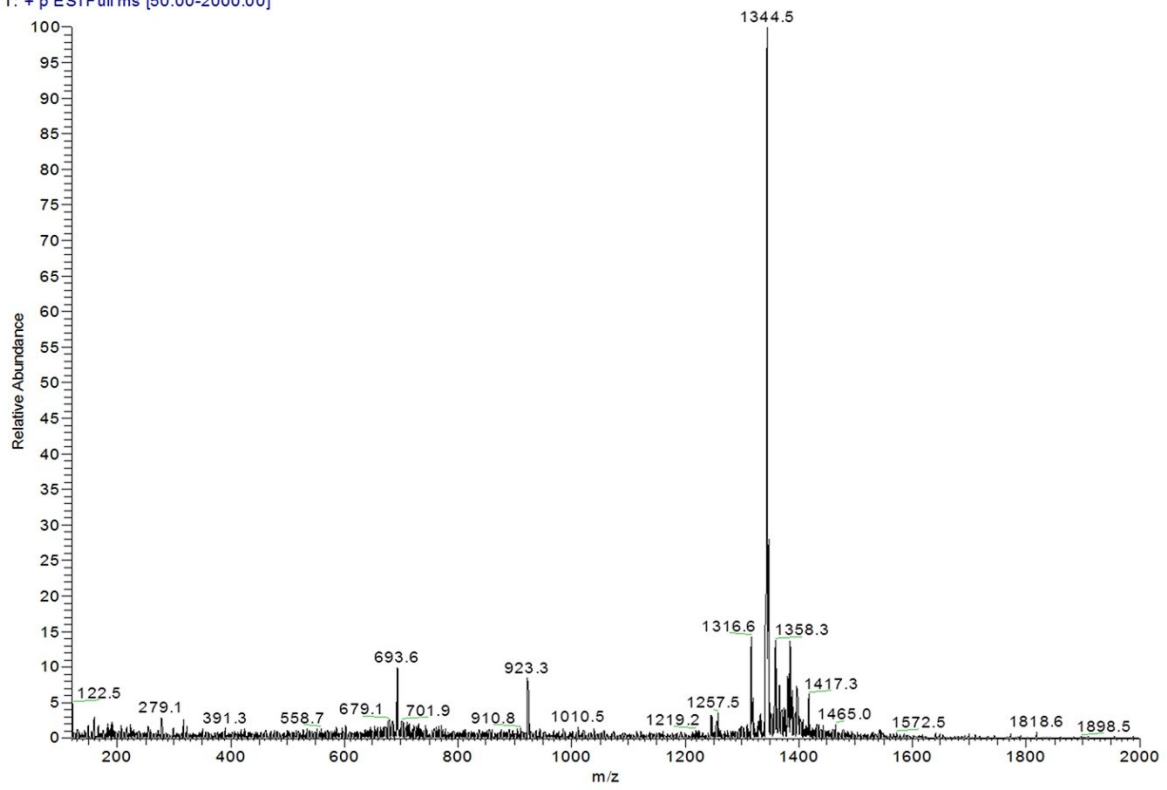

Fig. S3 ESI-Mass spectrum of N<sub>3</sub>-CKPSSPPEECW.

Inha\_2 #30-50 RT: 1.27-1.88 AV: 5 NL: 2.56E6  
T: + p ESI Full ms [50.00-2000.00]

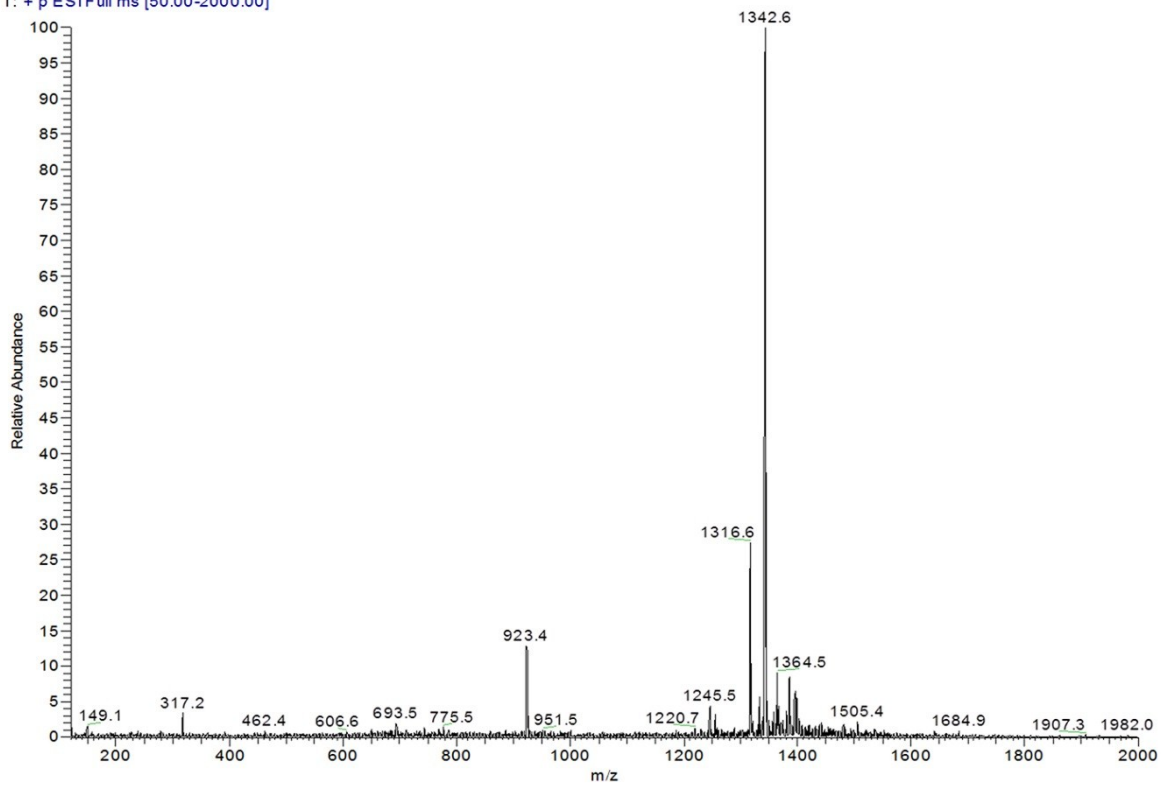

Fig. S4 ESI-Mass spectrum of N<sub>3</sub>-CKPSSPPEECW-SS.

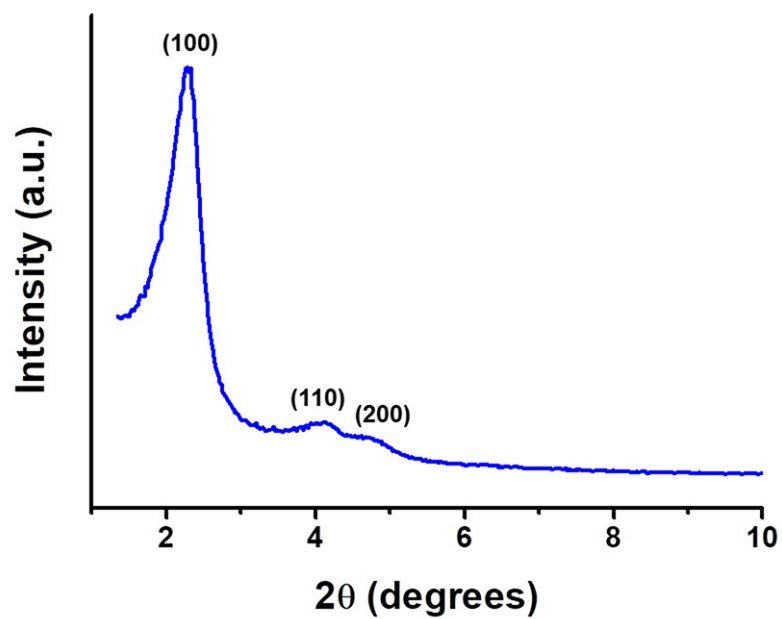

Fig. S5 Powder X-ray diffraction pattern of MCM-41.

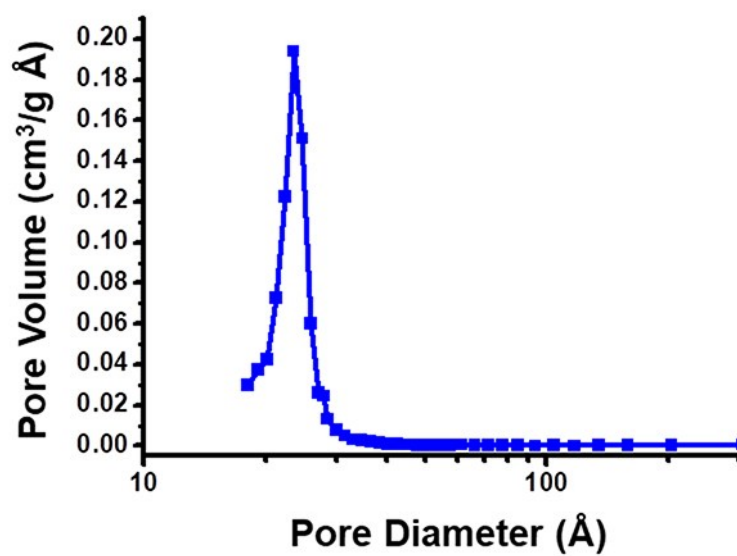

Fig. S6 Barrett-Joyner-Halenda pore size distribution analysis of MCM-41.

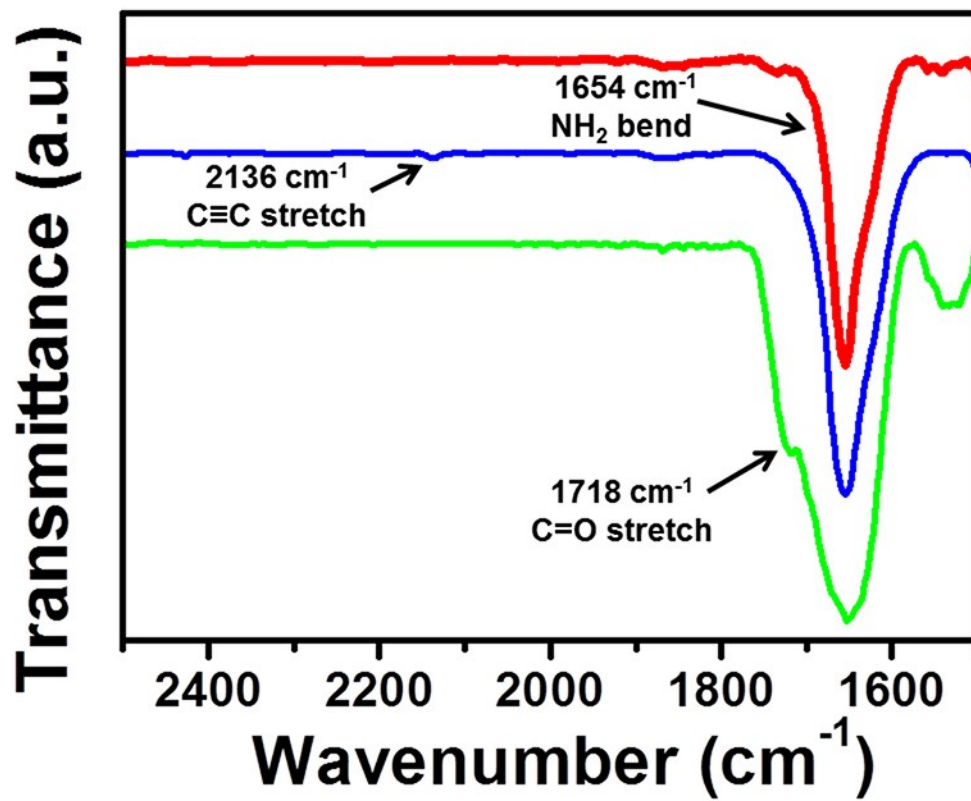

Fig. S7 FT-IR spectra of Si-NH $_2$  (a), Si-alkyne (b), and Si-cA6 (c).

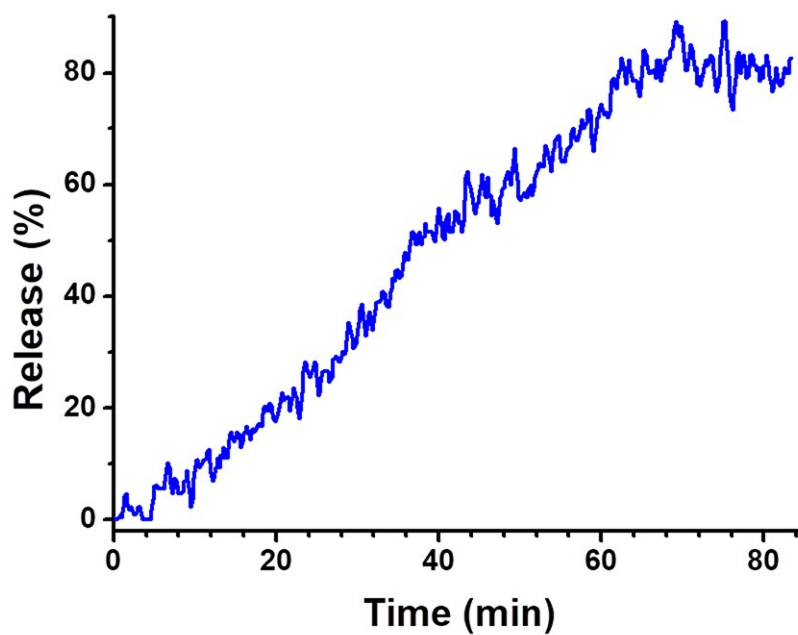

Fig. S8 Release profile of DOX from Si-alkyne without gatkeeper.



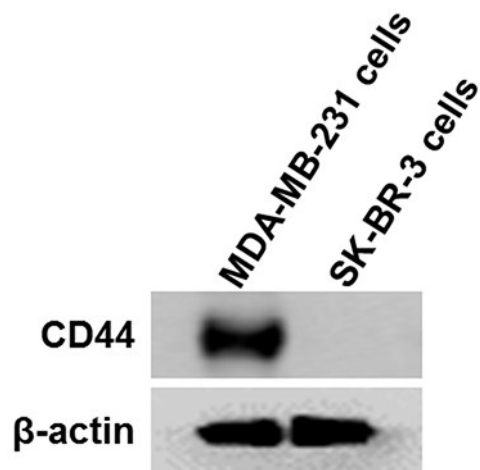

**Fig. S9** Expression of CD44 in MDA-MB-231 and SK-BR-3 cells..

## References

- 1 W. L. F. Armarego and D. D. Perrin, *Purification of Laboratory Chemicals*, Butterworth-Heinemann, Oxford, U.K, 1996.
